# Supplementary material for: Distinct oxygenation modes of the Gulf of Oman over the past 43 000 years – a multi-proxy approach
Source: Copernicus journal article supplement (doi:10.5194/bg-21-1477-2024), 2024-03-20
Supplement: Supplementary file 1 [file bg-21-1477-2024-supplement.zip]

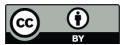

*Supplement of*

**Distinct oxygenation modes of the Gulf of Oman over the past 43 000 years – a multi-proxy approach**

**Nicole Burdanowitz et al.**

*Correspondence to:* Nicole Burdanowitz ([nicole.burdanowitz@uni-hamburg.de](mailto:nicole.burdanowitz@uni-hamburg.de))

- [bg-21-1477-2024-supplement-title-page.pdf](#)
- [TableS1\\_SL167\\_BenthicForam\\_Percent\\_O2\\_Requirements.xlsx](#)

The copyright of individual parts of the supplement might differ from the article licence.
